# Supplementary material
Source: PubMed Central journal article supplement (PMC3084898)
Supplement: NIHMS287121-supplement-1_si_001.pdf [file NIHMS287121-supplement-1_si_001.pdf]

# Supporting Information for

  

## Chemical Noise Reduction via Mass Spectrometry and Ion/Ion Charge Inversion: Amino Acids

Kerry M. Hassell<sup>†</sup>, Yves C. LeBlanc<sup>‡</sup> and Scott A. McLuckey<sup>†\*</sup>

<sup>†</sup>Department of Chemistry  
Purdue University  
West Lafayette, Indiana, USA 47907-1393

<sup>‡</sup>AB SCIEX  
71 Four Valley Drive  
Concord, Ontario, Canada L4K4V8

### Table of Contents

**Figure S-1** – a) Isolated deprotonated arginine prior to ion/ion reaction. b) Post-ion/ion reaction positive ion mass spectrum after reaction of deprotonated arginine with the 10+ charge state of PAMAM generation 3.0.

**Figure S-2** - Spectra of a mixture of amino acids (a) ionized as cations and (b) reacted with PAMAM 3.5 anions to convert the cations to anions. The peak indicated with \* corresponds to a fragment ion known to be formed from the collision-induced dissociation of several of the amino acid cations present in (a).

**Figure S-3** - Operational charge inversion efficiencies (see text for definition) for several amino acid cations in reaction with 1.5 [PAMAM-6H]<sup>6-</sup> anions.

**Figure S-4** - Response curves for histidine spiked in precipitated plasma. (a) Protonated histidine abundance versus concentration observed directly via positive nESI and (b) deprotonated histidine abundance versus concentration following charge inversion.

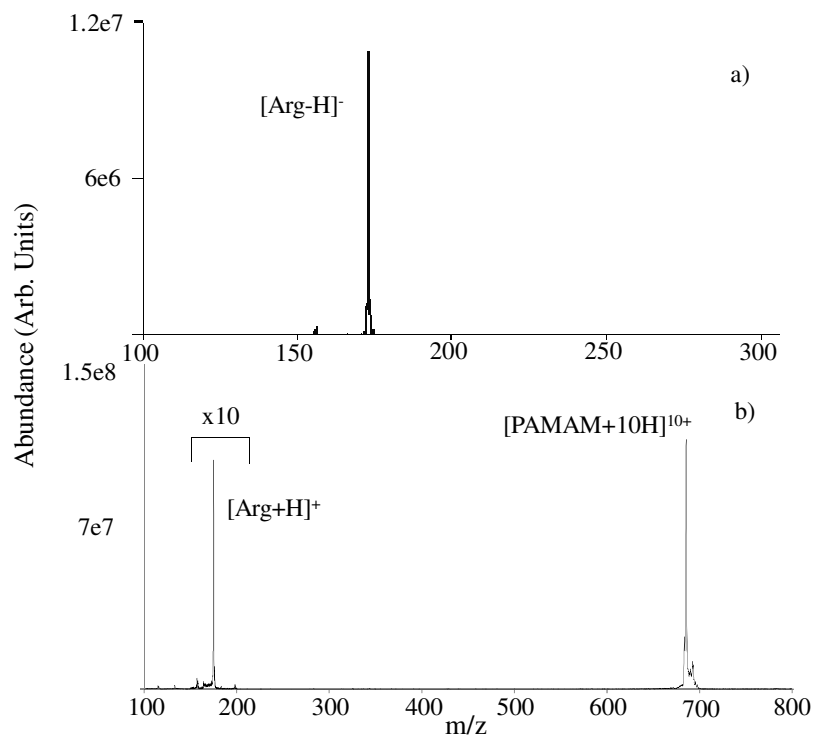

**Figure S-1** – a) Isolated deprotonated arginine prior to ion/ion reaction. b) Post-ion/ion reaction positive ion mass spectrum after reaction of deprotonated arginine with the 10+ charge state of PAMAM generation 3.0.

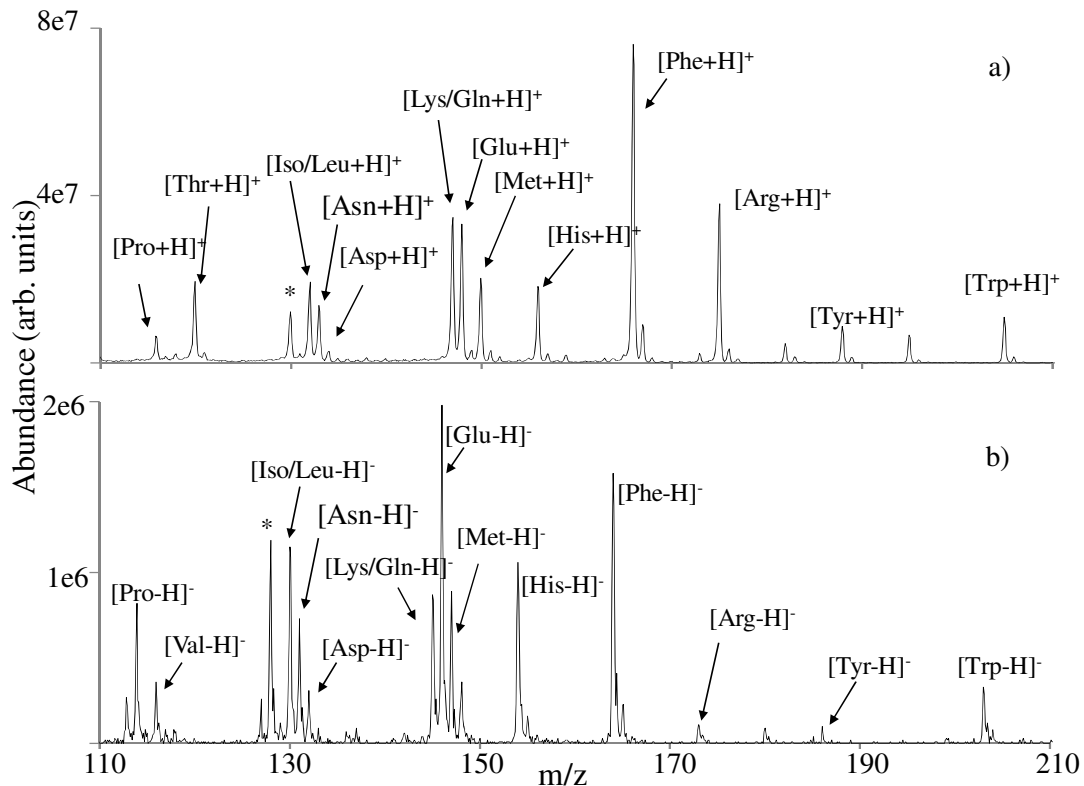

**Figure S-2** - Spectra of a mixture of amino acids (a) ionized as cations and (b) reacted with PAMAM 3.5 anions to convert the cations to anions. The peak indicated with \* corresponds to a fragment ion known to be formed from the collision-induced dissociation of several of the amino acid cations present in (a).

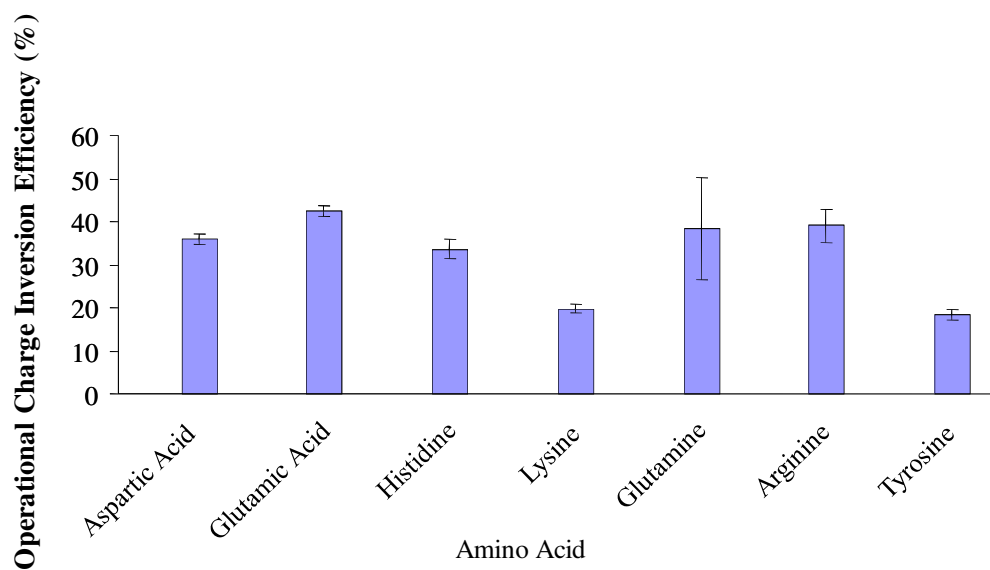

**Figure S-3.** – Operational charge inversion efficiencies (see text for definition) for several amino acid cations in reaction with 1.5 [PAMAM-6H]<sup>6-</sup> anions.

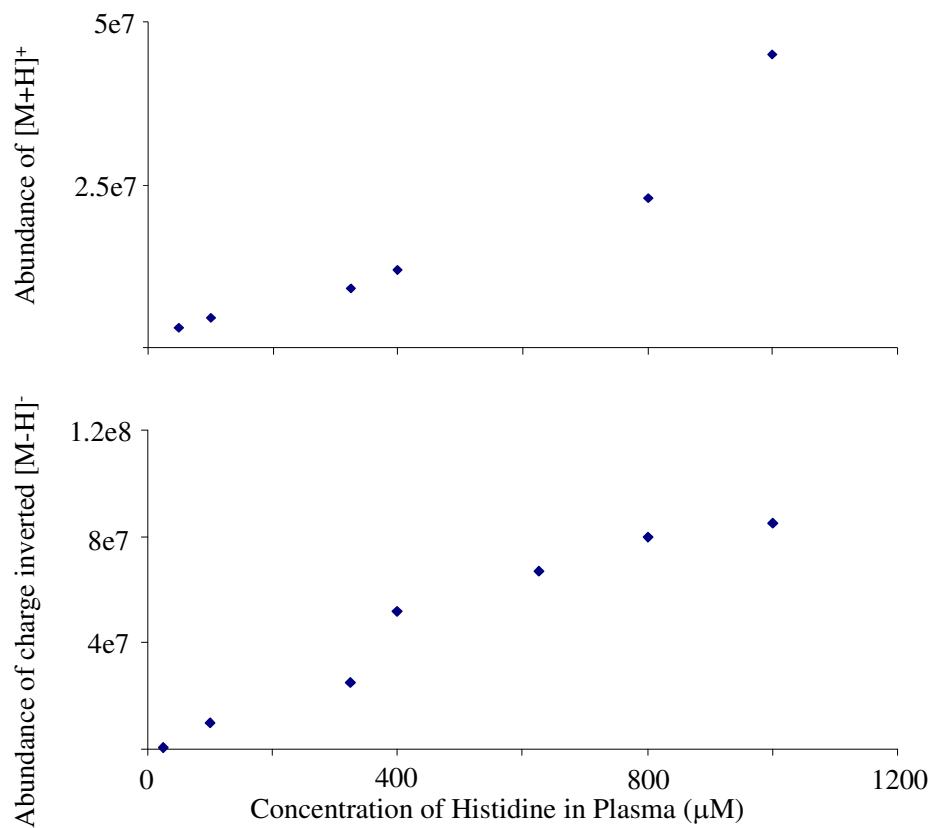

**Figure S-4** – Response curves for histidine spiked in precipitated plasma. (a) Protonated histidine abundance versus concentration observed directly via positive nESI and (b) deprotonated histidine abundance versus concentration following charge inversion.
